# Supplementary material for: The association between lactate dehydrogenase to serum albumin ratio and the 28-day mortality in patients with sepsis-associated acute kidney injury in intensive care: a retrospective cohort study
Source: PubMed Central journal article supplement (PMC10193884; doi:10.1080/0886022x.2023.2212080), 2023-05-17
Supplement: IRNF_A_2212080_SM1429.pdf [file IRNF_A_2212080_SM1429.pdf]

**Table S1** Results of univariate analysis of 28-day mortality.

| <b>Characteristic</b>     | <b>HR (95% CI)</b>      | <b><i>P</i> value</b> |
|---------------------------|-------------------------|-----------------------|
| Age                       | 1.02 (1.01, 1.02)       | < 0.001               |
| Gender                    | 0.96 (0.88, 1.06)       | 0.455                 |
| Ethnicity                 | 0.78 (0.71, 0.86)       | < 0.001               |
| Weight                    | 0.9954 (0.9934, 0.9974) | < 0.001               |
| Insurance                 | 1.25 (1.14, 1.37)       | < 0.001               |
| UO                        | 0.9997 (0.9996, 0.9997) | < 0.001               |
| <b>AKI stage</b>          |                         |                       |
| 1                         | (Ref)                   |                       |
| 2                         | 1.24 (1.04, 1.47)       | 0.014                 |
| 3                         | 2.97 (2.52, 3.5)        | < 0.001               |
| Heart rate                | 1.0035 (1.0008, 1.0062) | 0.01                  |
| MAP                       | 0.9923 (0.9889, 0.9957) | < 0.001               |
| Respiration rate          | 1.04 (1.03, 1.05)       | < 0.001               |
| SPO <sub>2</sub>          | 0.95 (0.93, 0.96)       | < 0.001               |
| SOFA score                | 1.08 (1.06, 1.1)        | < 0.001               |
| APS III                   | 1.02 (1.02, 1.02)       | < 0.001               |
| CCI                       | 1.14 (1.12, 1.15)       | < 0.001               |
| Hemoglobin                | 0.95 (0.93, 0.97)       | < 0.001               |
| Platelets                 | 0.9997 (0.9992, 1.0001) | 0.144                 |
| WBC                       | 1.0045 (1.0024, 1.0067) | < 0.001               |
| LDH                       | 1.0001 (1.0001, 1.0001) | < 0.001               |
| Albumin                   | 0.97 (0.96, 0.98)       | < 0.001               |
| LAR                       | 1.0024 (1.0019, 1.003)  | < 0.001               |
| SCr                       | 1.1 (1.07, 1.13)        | < 0.001               |
| Glucose                   | 1.0097 (1.0003, 1.0193) | 0.044                 |
| pH                        | 0.2 (0.13, 0.3)         | < 0.001               |
| Chloride                  | 0.98 (0.97, 0.99)       | < 0.001               |
| Sodium                    | 0.9907 (0.9831, 0.9983) | 0.017                 |
| Potassium                 | 1.14 (1.08, 1.2)        | < 0.001               |
| Bicarbonate               | 0.97 (0.96, 0.98)       | < 0.001               |
| Ventilator use            | 0.91 (0.82, 1.03)       | 0.125                 |
| Vasopressor use           | 1.53 (1.35, 1.74)       | < 0.001               |
| RRT                       | 1.48 (1.19, 1.84)       | < 0.001               |
| Loop diuretics use        | 1.3 (1.13, 1.5)         | < 0.001               |
| Septic shock              | 1.67 (1.48, 1.89)       | < 0.001               |
| Hypertension              | 0.85 (0.76, 0.95)       | 0.003                 |
| Diabetes mellitus         | 0.98 (0.89, 1.09)       | 0.741                 |
| Myocardial infarct        | 1.23 (1.09, 1.37)       | < 0.001               |
| Congestive heart failure  | 1.17 (1.06, 1.29)       | 0.002                 |
| Chronic pulmonary disease | 1.06 (0.95, 1.18)       | 0.273                 |
| Malignant cancer          | 1.67 (1.49, 1.87)       | < 0.001               |
| Liver disease             | 1.56 (1.41, 1.72)       | < 0.001               |

MAP, mean arterial pressure; SOFA score, sequential organ failure assessment score; APS III, acute physiology score III; CCI, Charlson comorbidity index; WBC, white blood count; LDH, lactate dehydrogenase; LAR, lactate dehydrogenase to albumin ratio; SCr, serum creatinine; RRT, renal replacement treatment; AKI, acute kidney injury.
